# Supplementary material for: Synthesis, spectral characteristics and supramolecular organization of new non-symmetrically 1,6- and 1,4-dialkyl- 3а,6а-diphenylglycolurils
Source: Research Square preprint supplement (doi:10.21203/rs.3.rs-7809756/v1), 2025-10-27

**The electronic supplementary information**

## Synthesis, spectral characteristics and supramolecular organization of new non-symmetrically 1,6- and 1,4-dialkyl-3а,6а-diphenylglycolurils

***Vladimir V. Baranov (0000-0003-4818-7807),* Maria M. Antonova, (0000-0001-6492-2483), Svetlana A. Soloveva (0000-0003-2821-6252), Yuri A. Strelenko (0000-0002-3030-7041), *Angelina N. Kravchenko (0000-0002-6210-4775)***

**Copies of NMR spectra.**

**
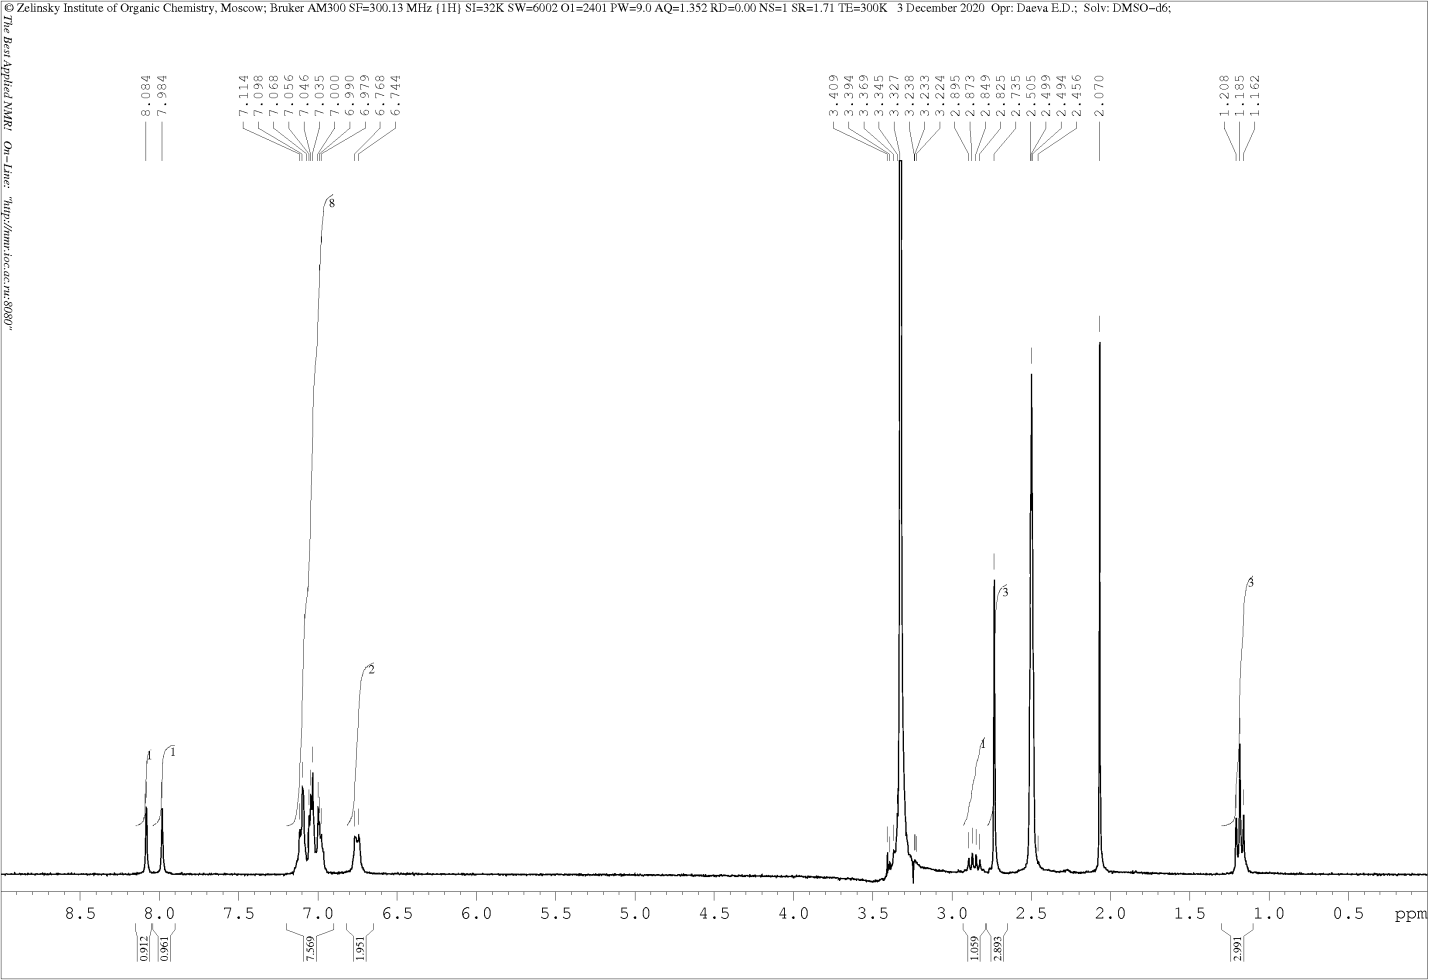
**

**
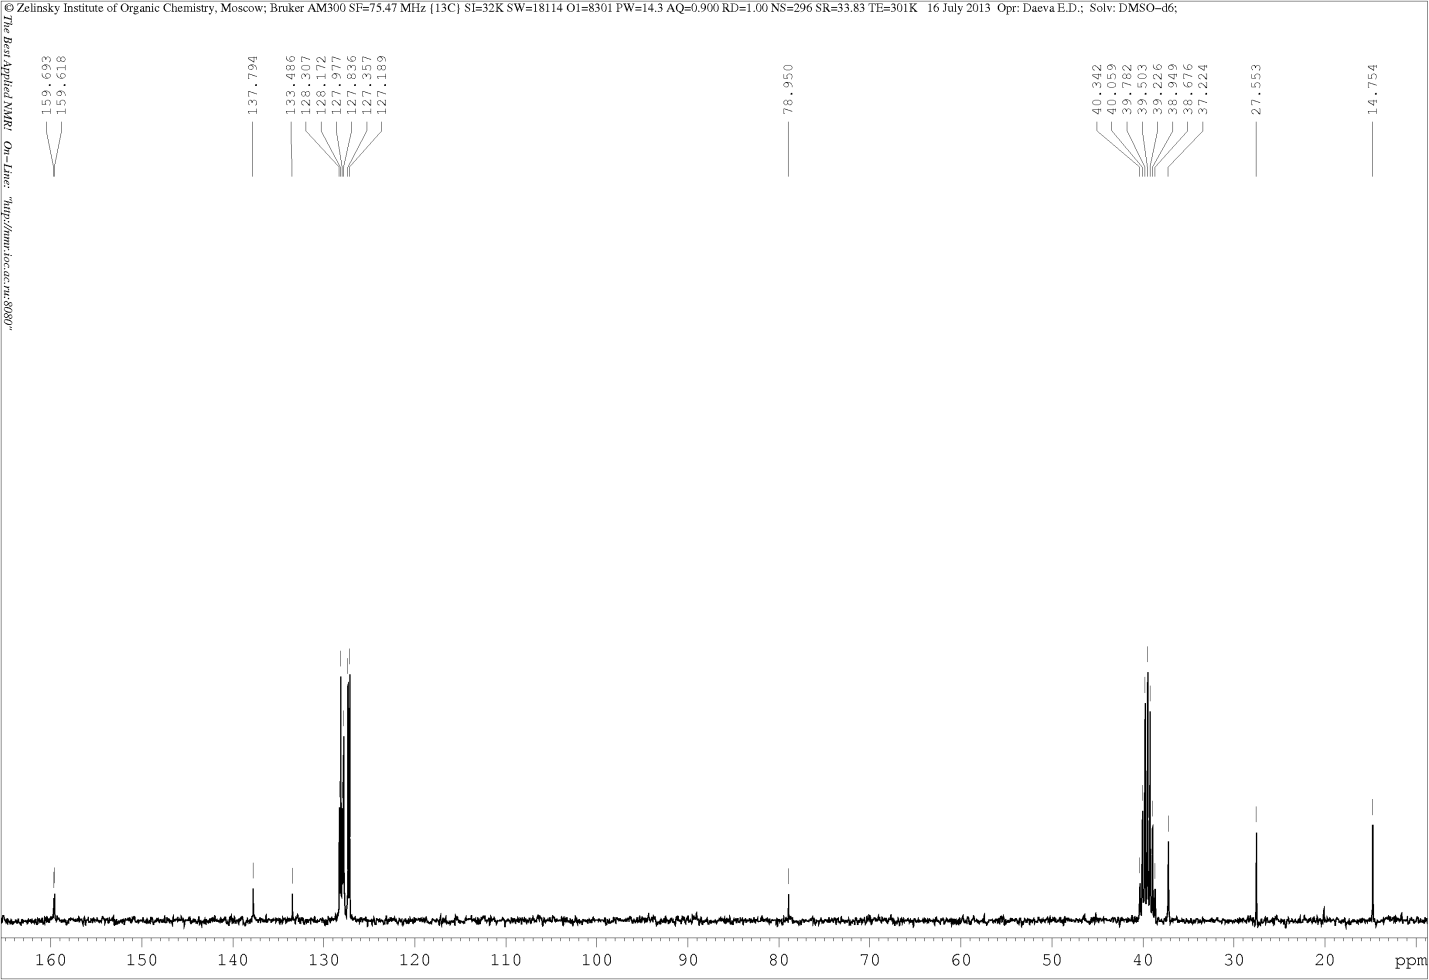
**

**
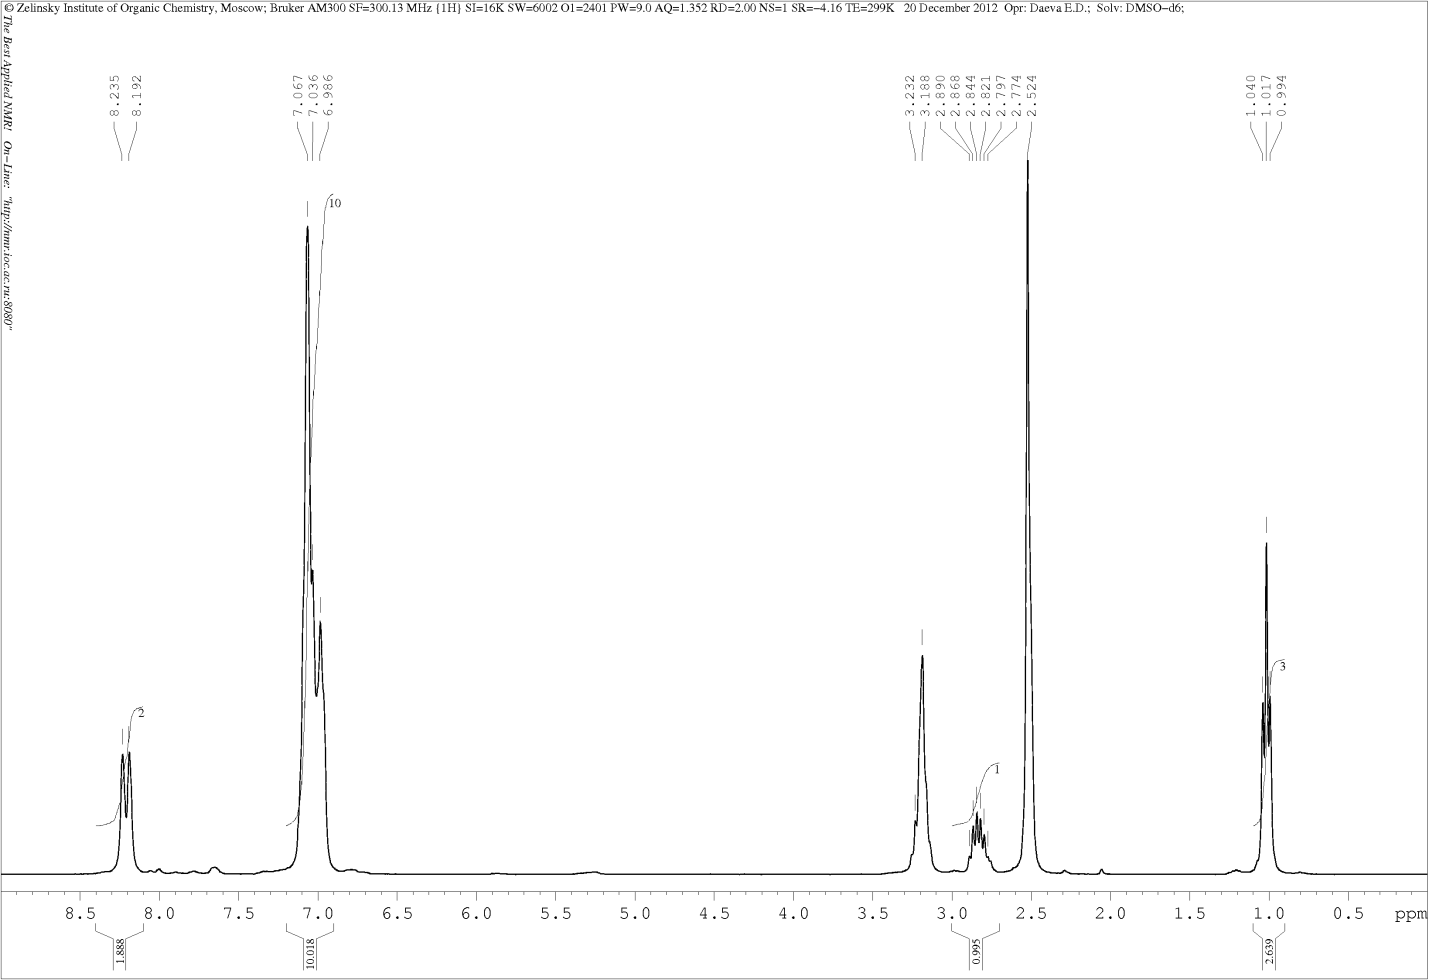
**

**
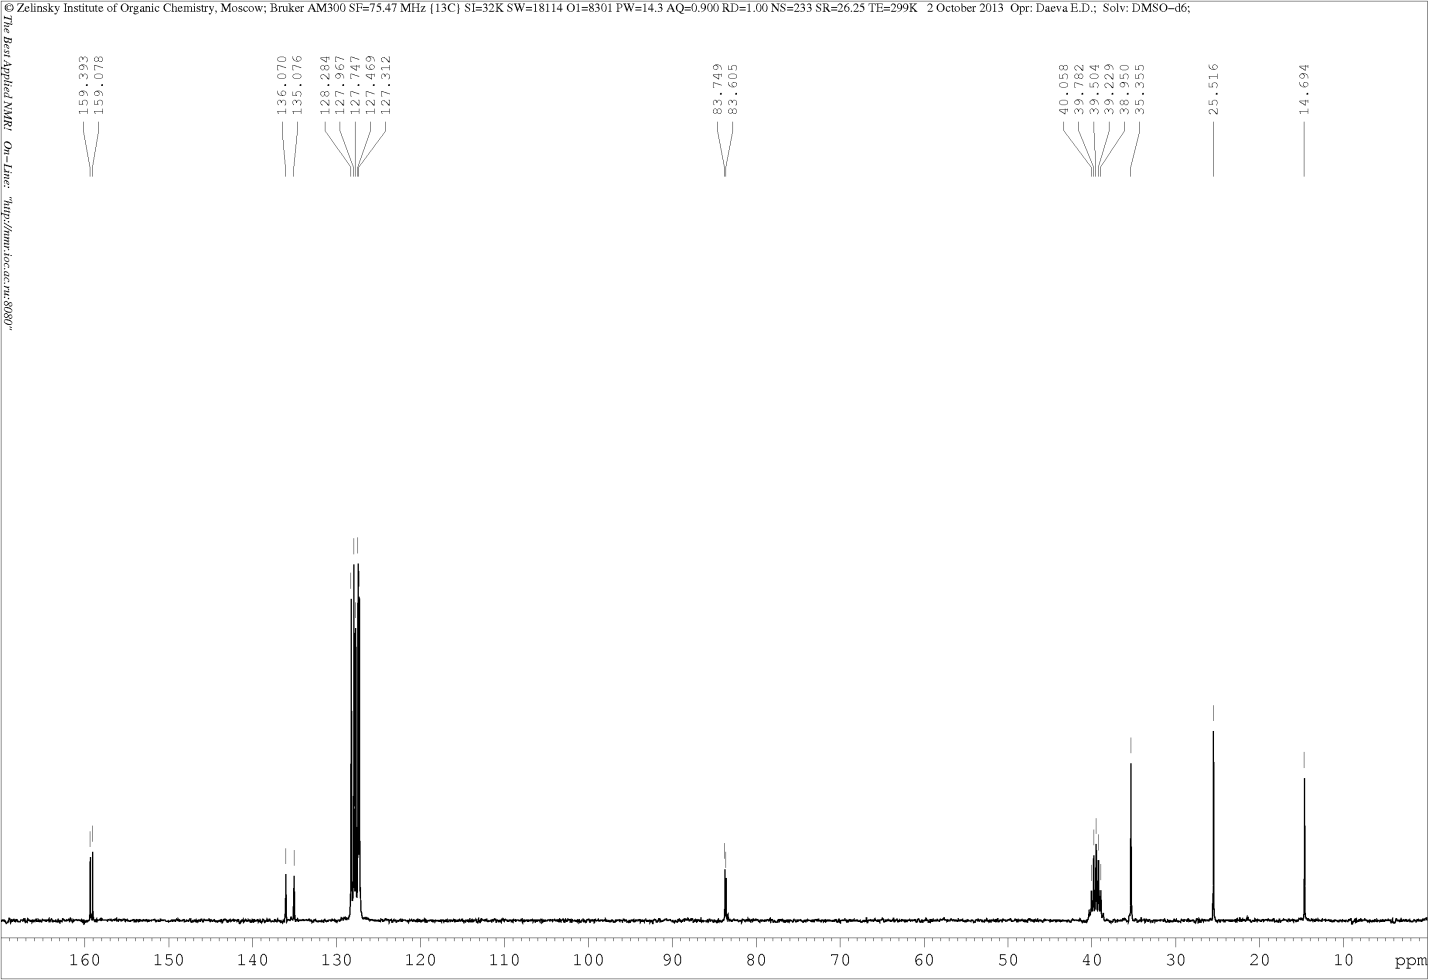
**

**
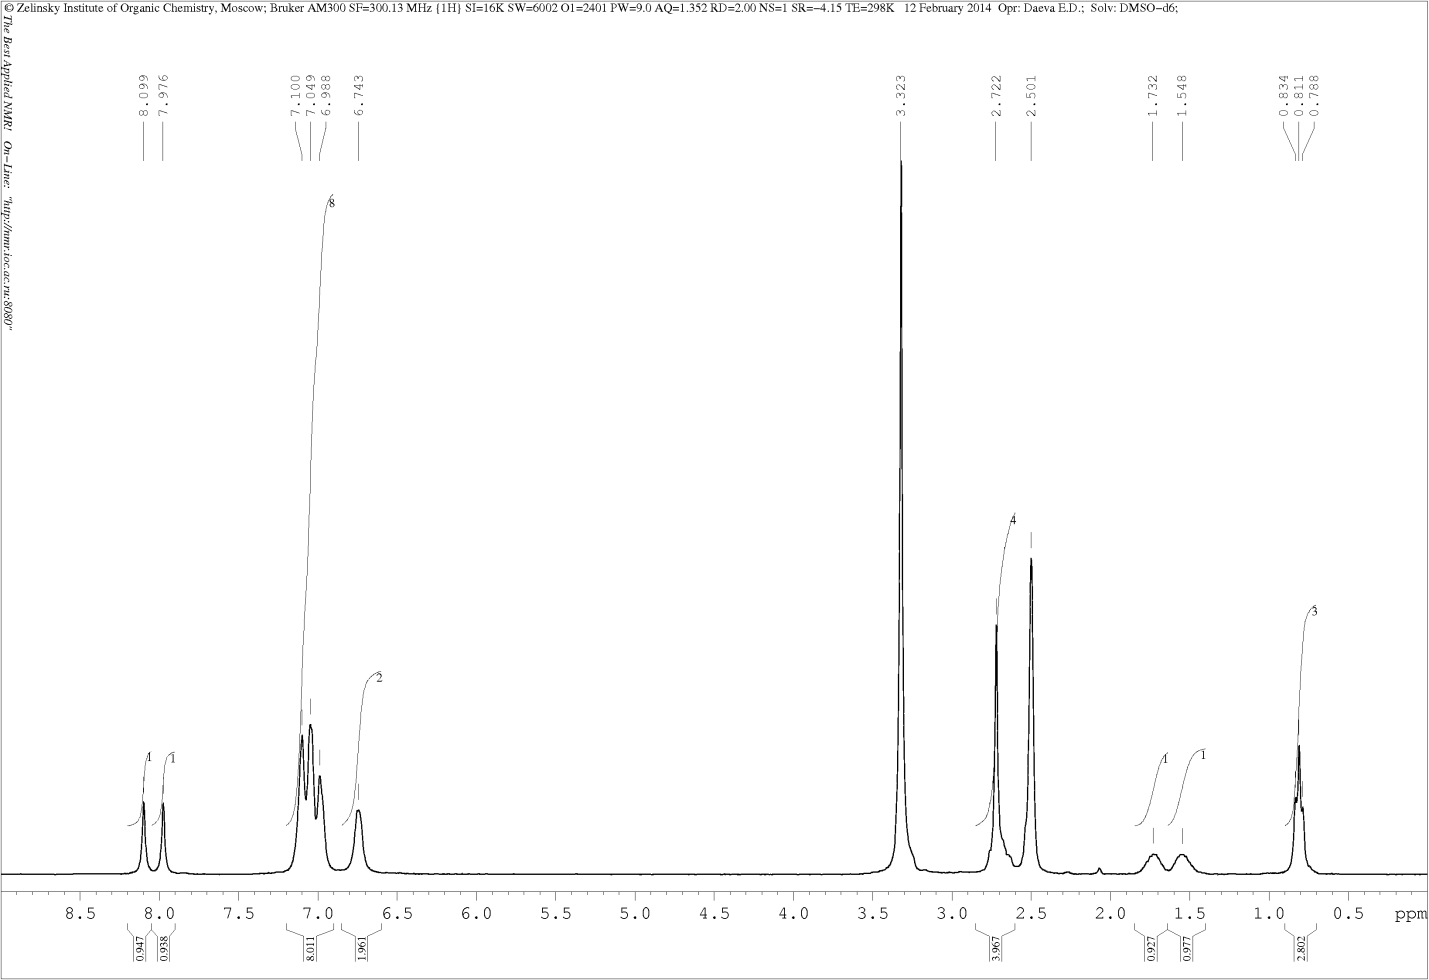
**


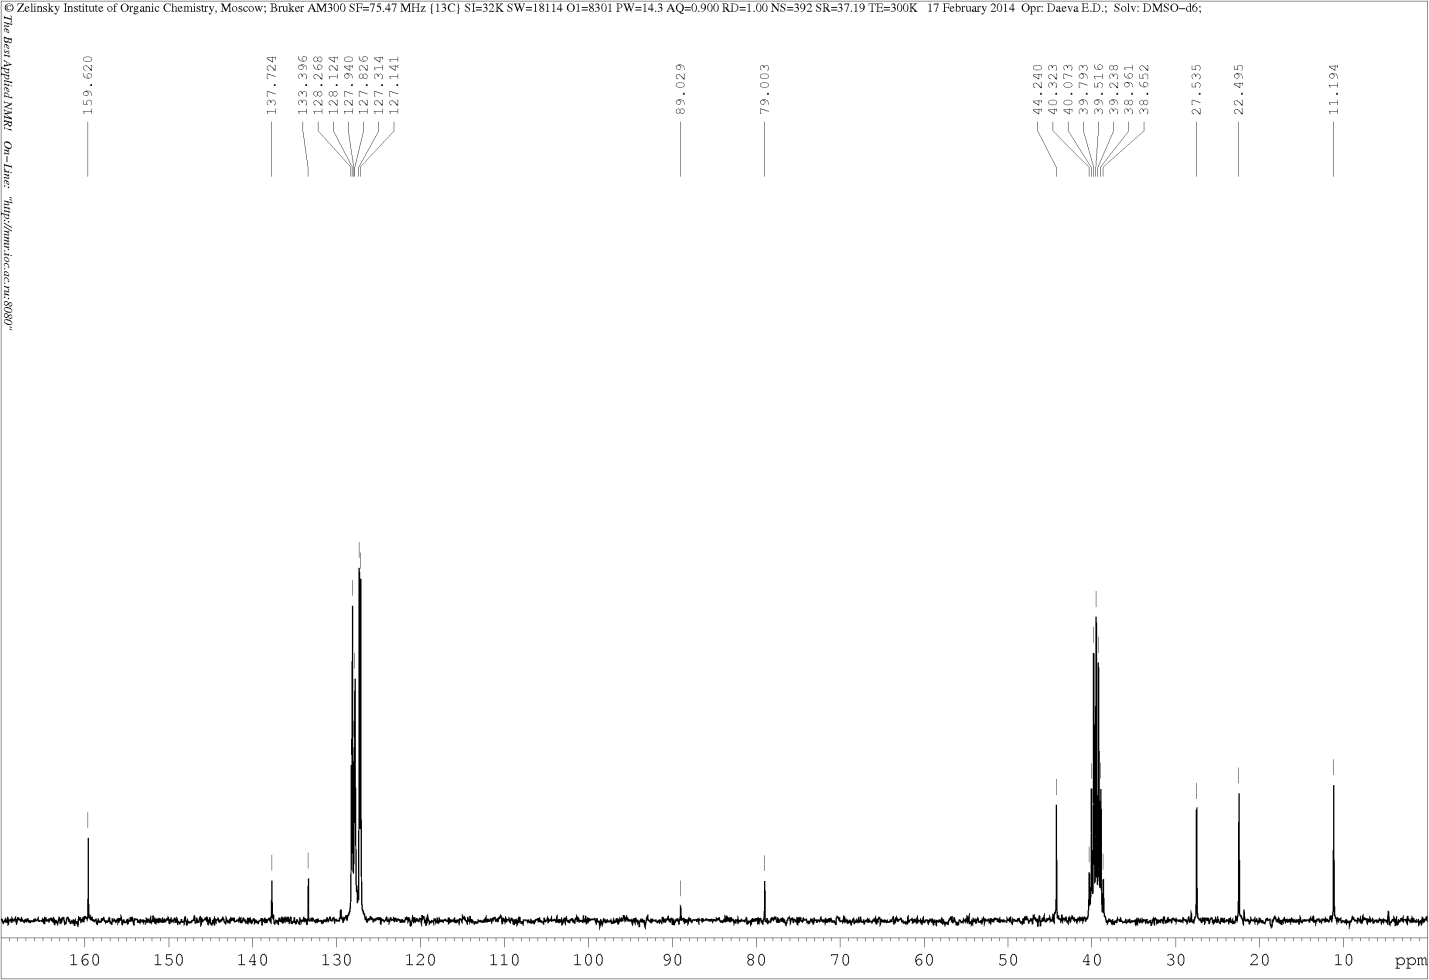

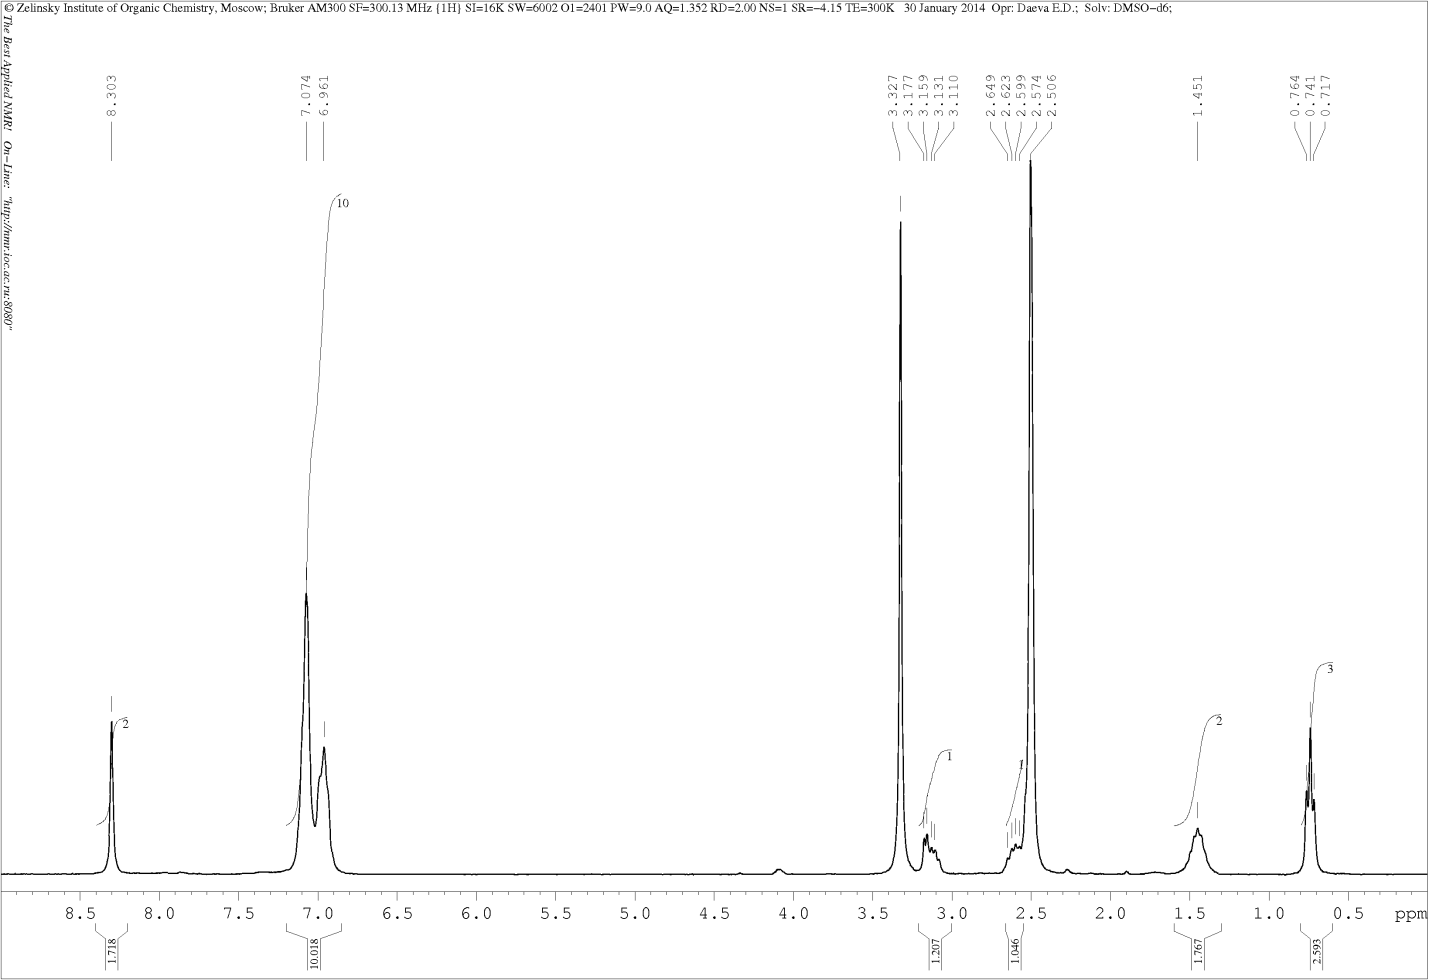


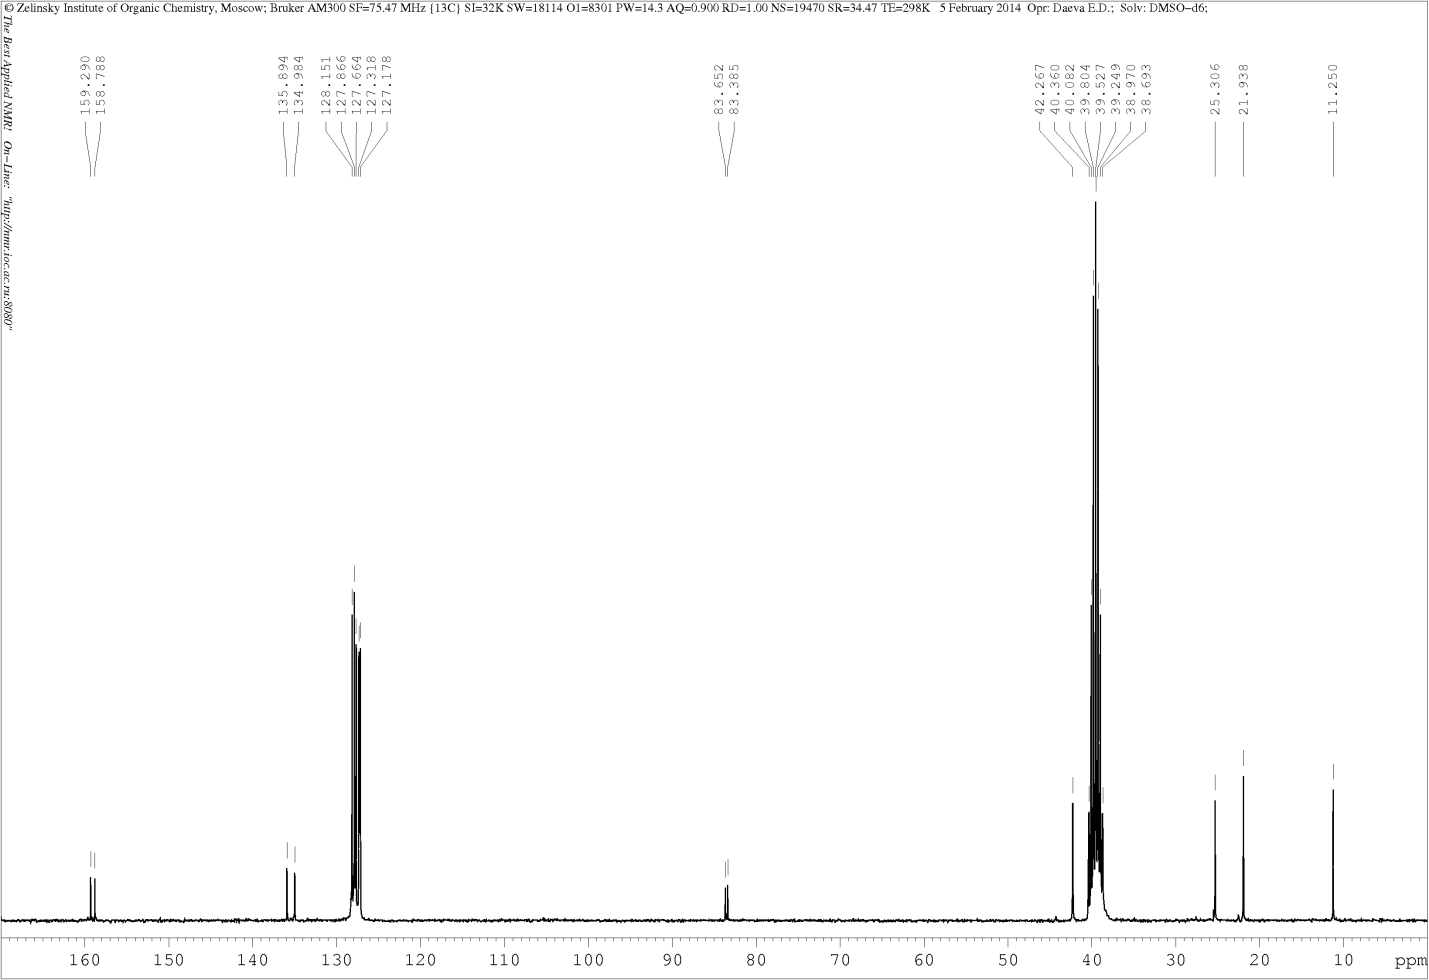


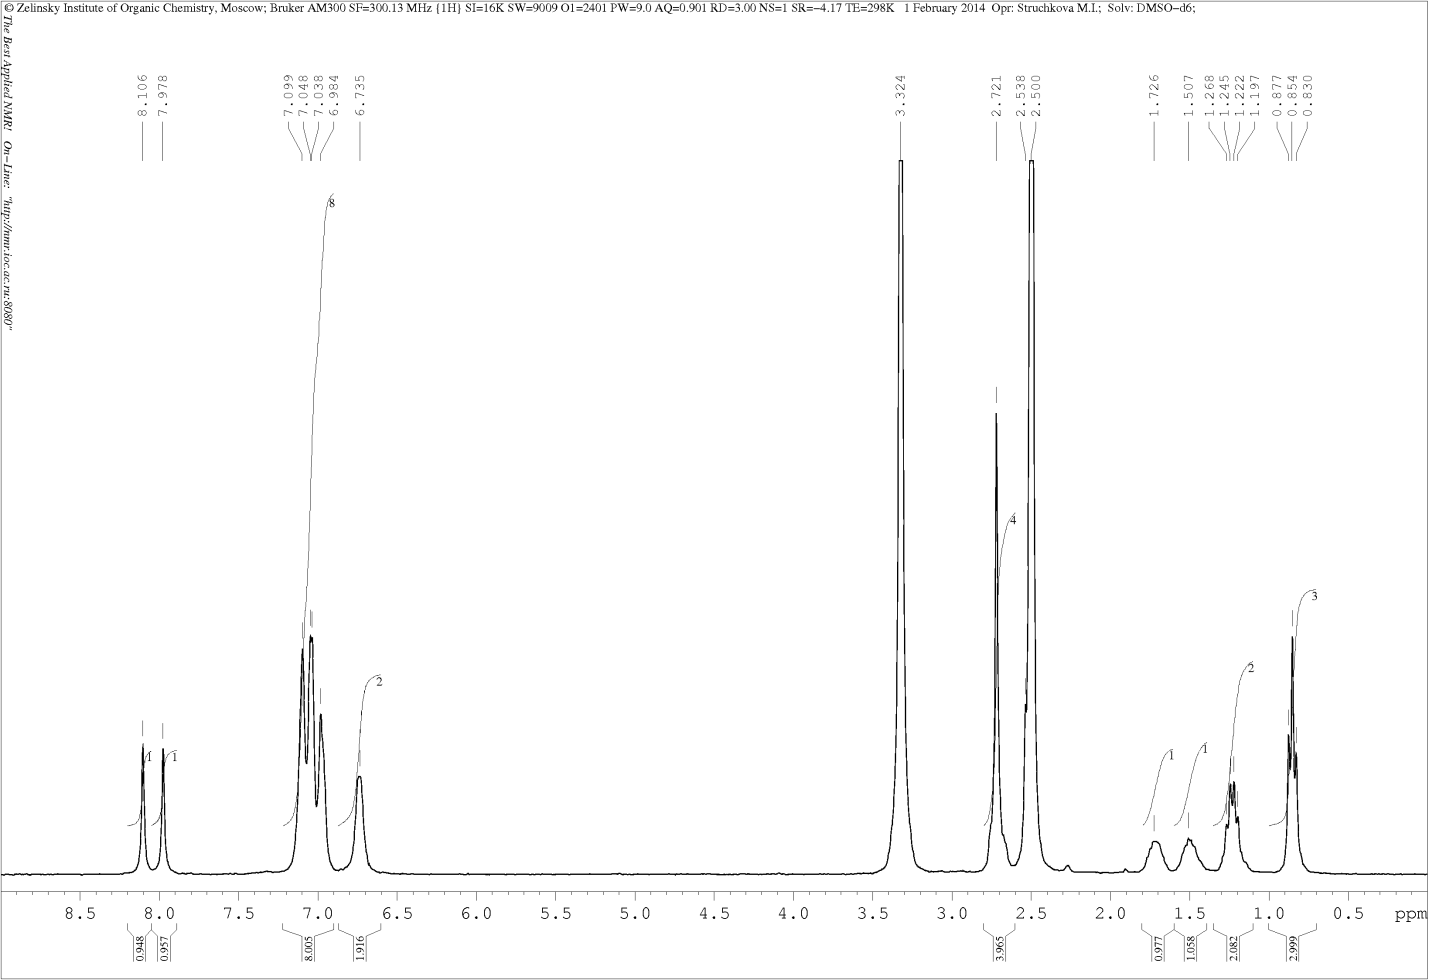


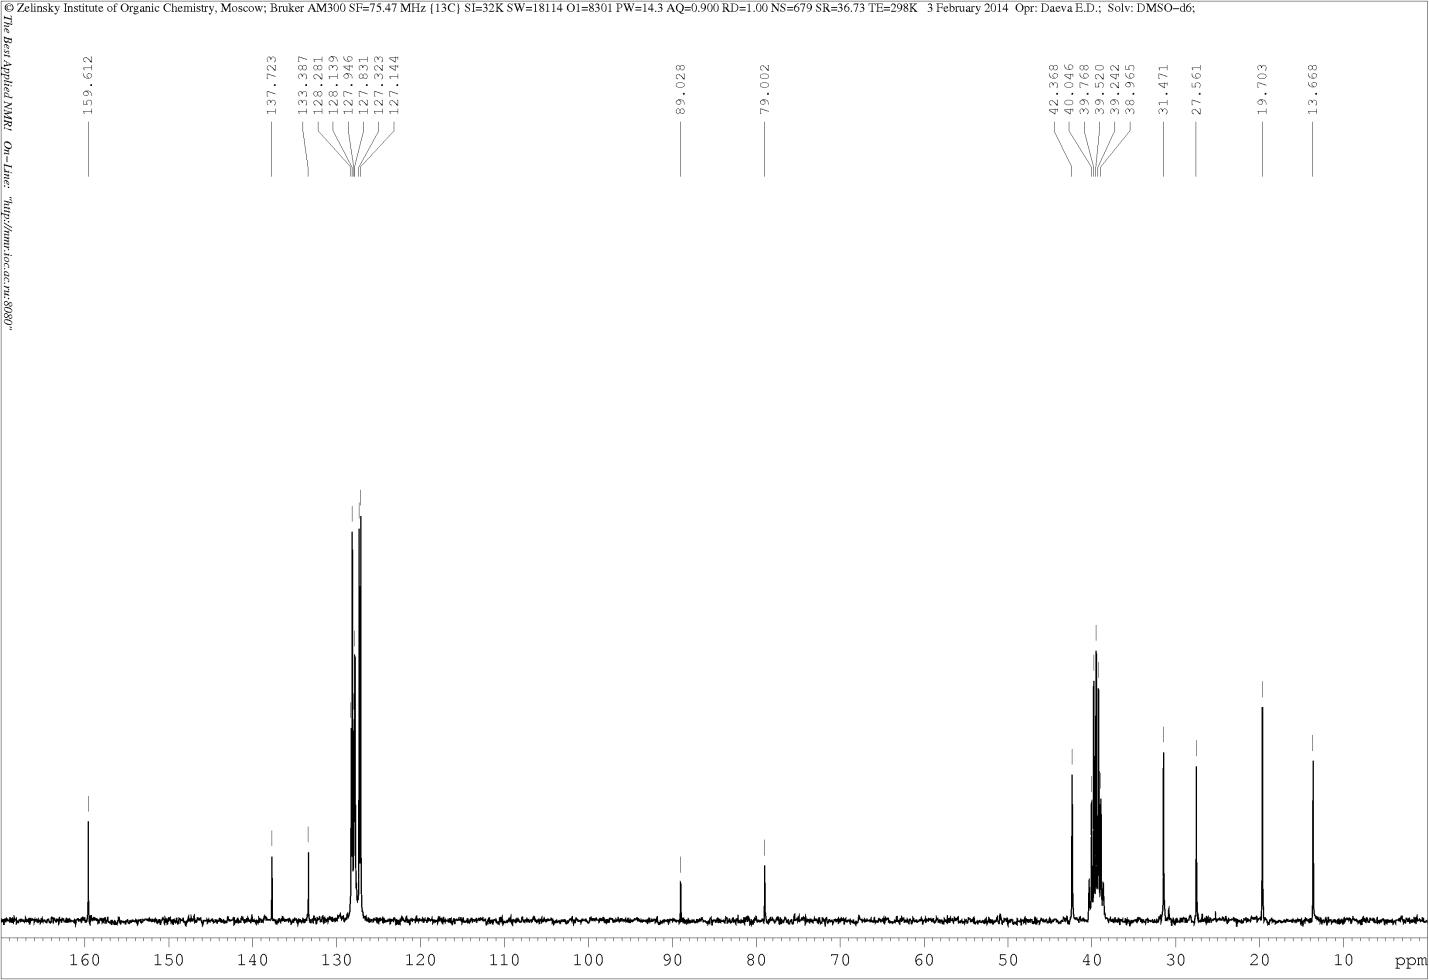


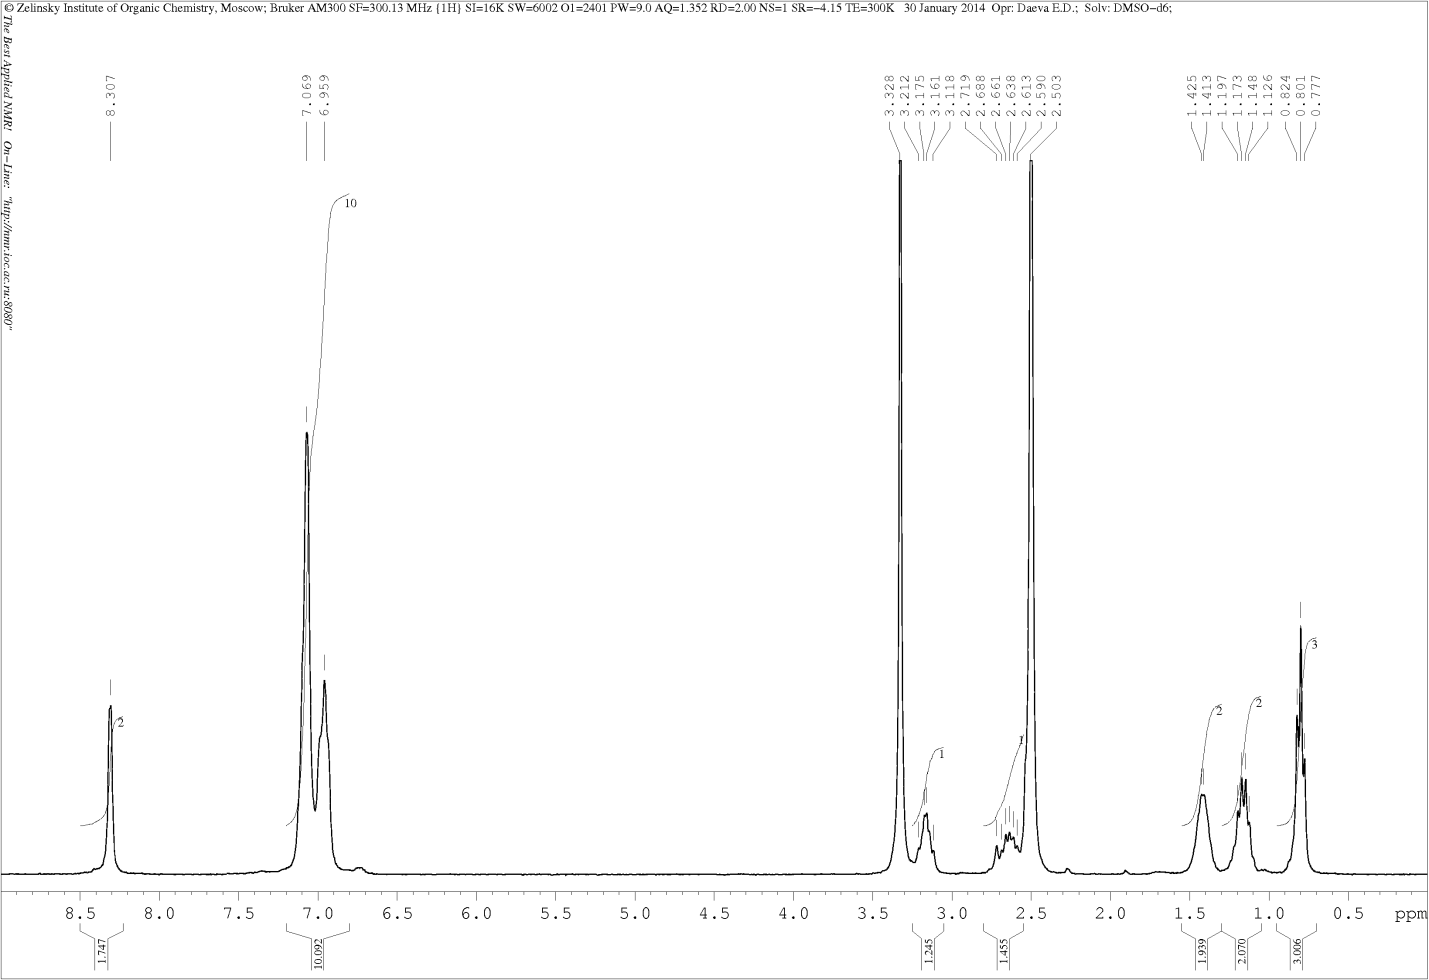


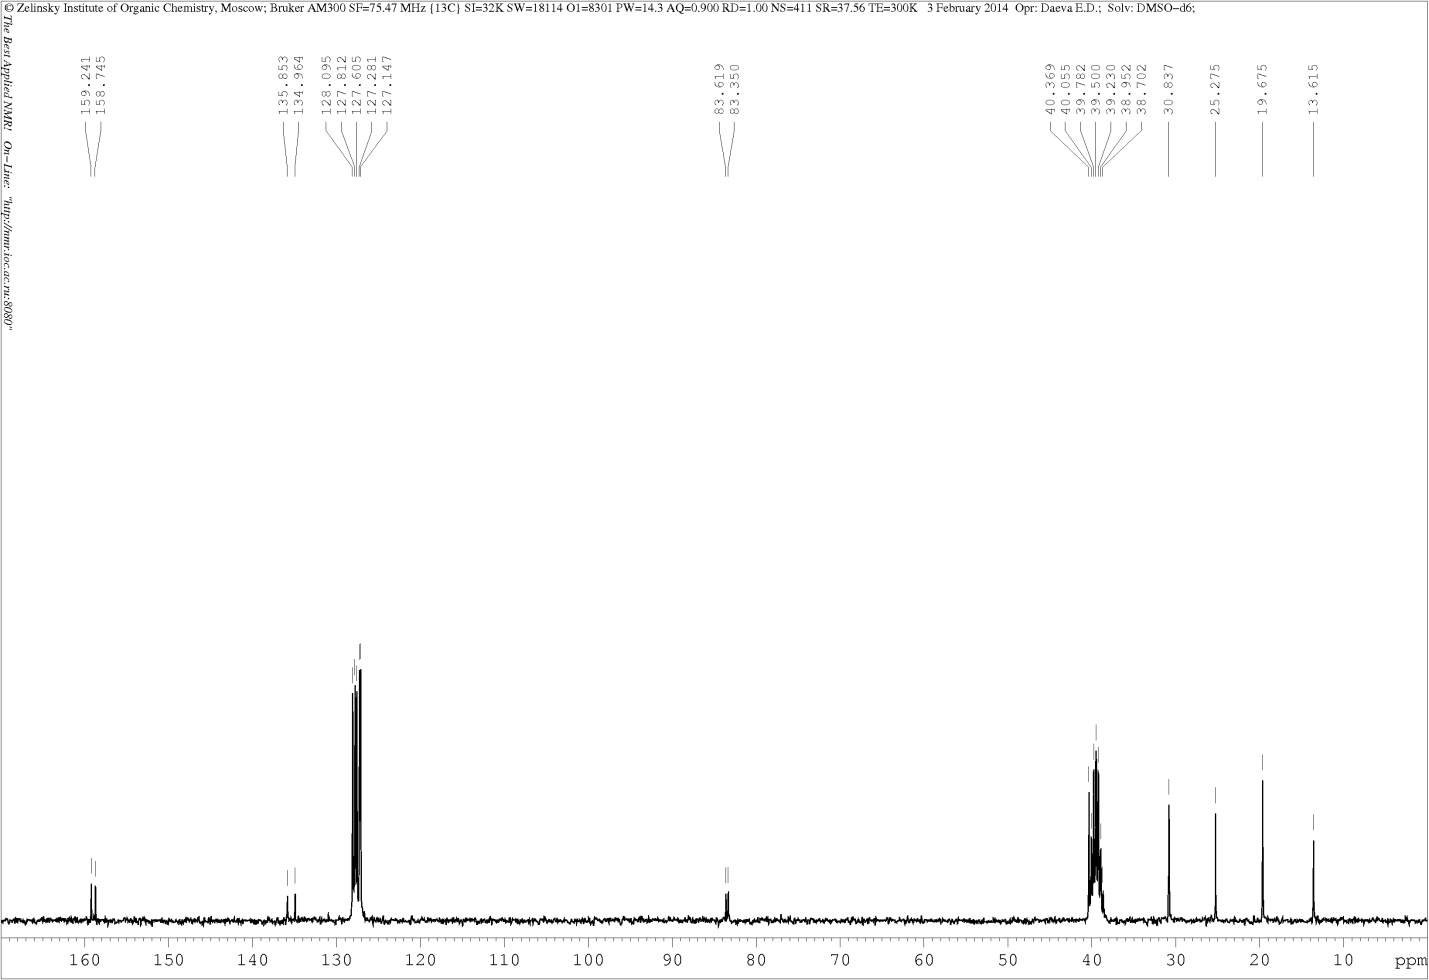


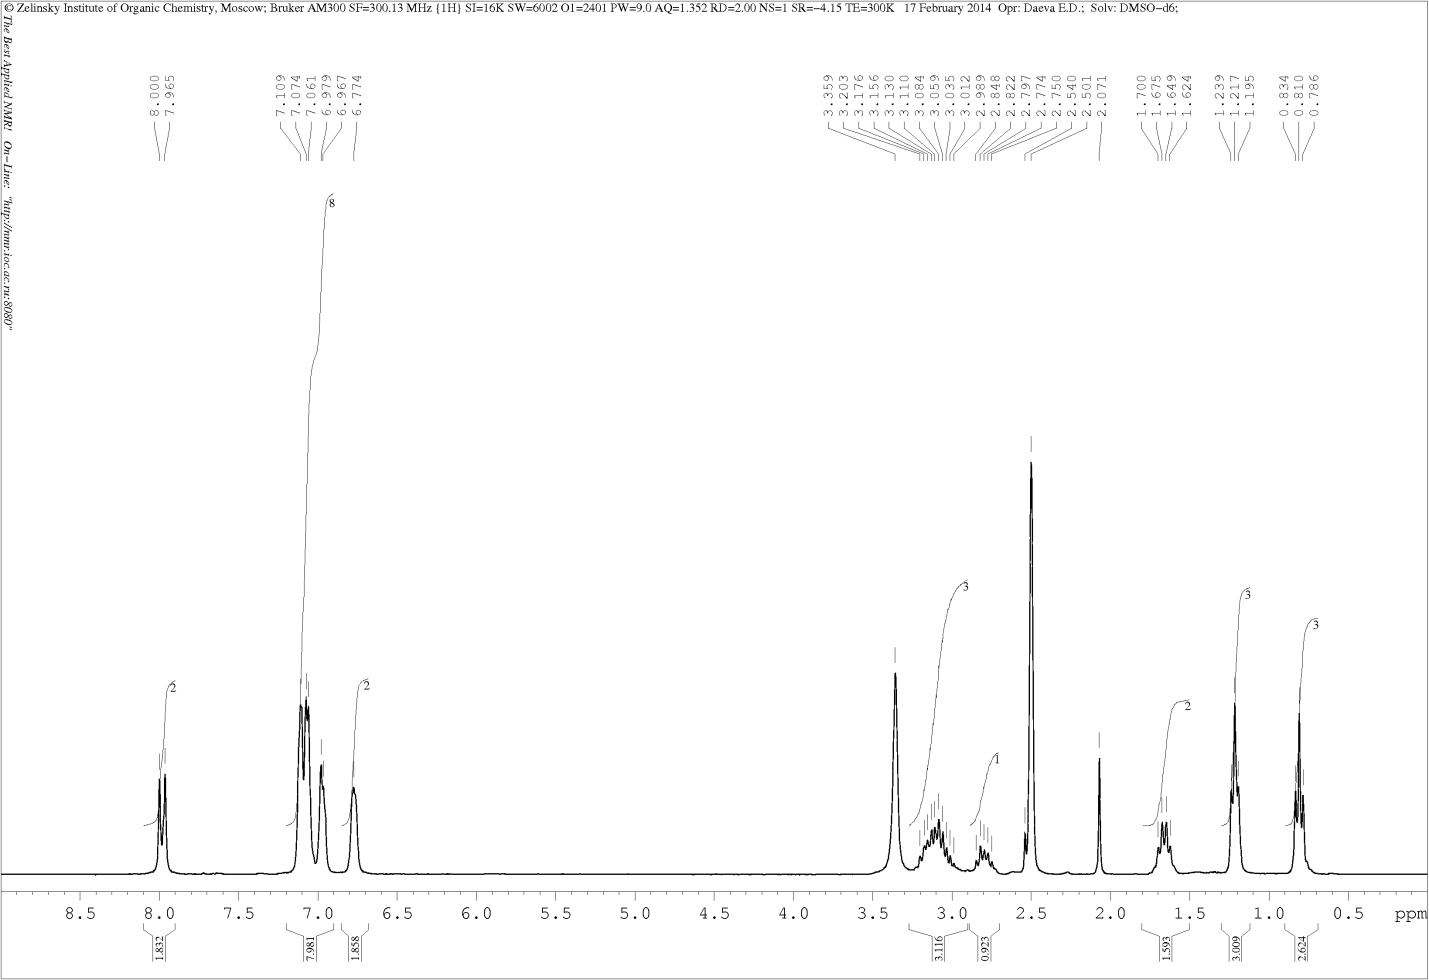


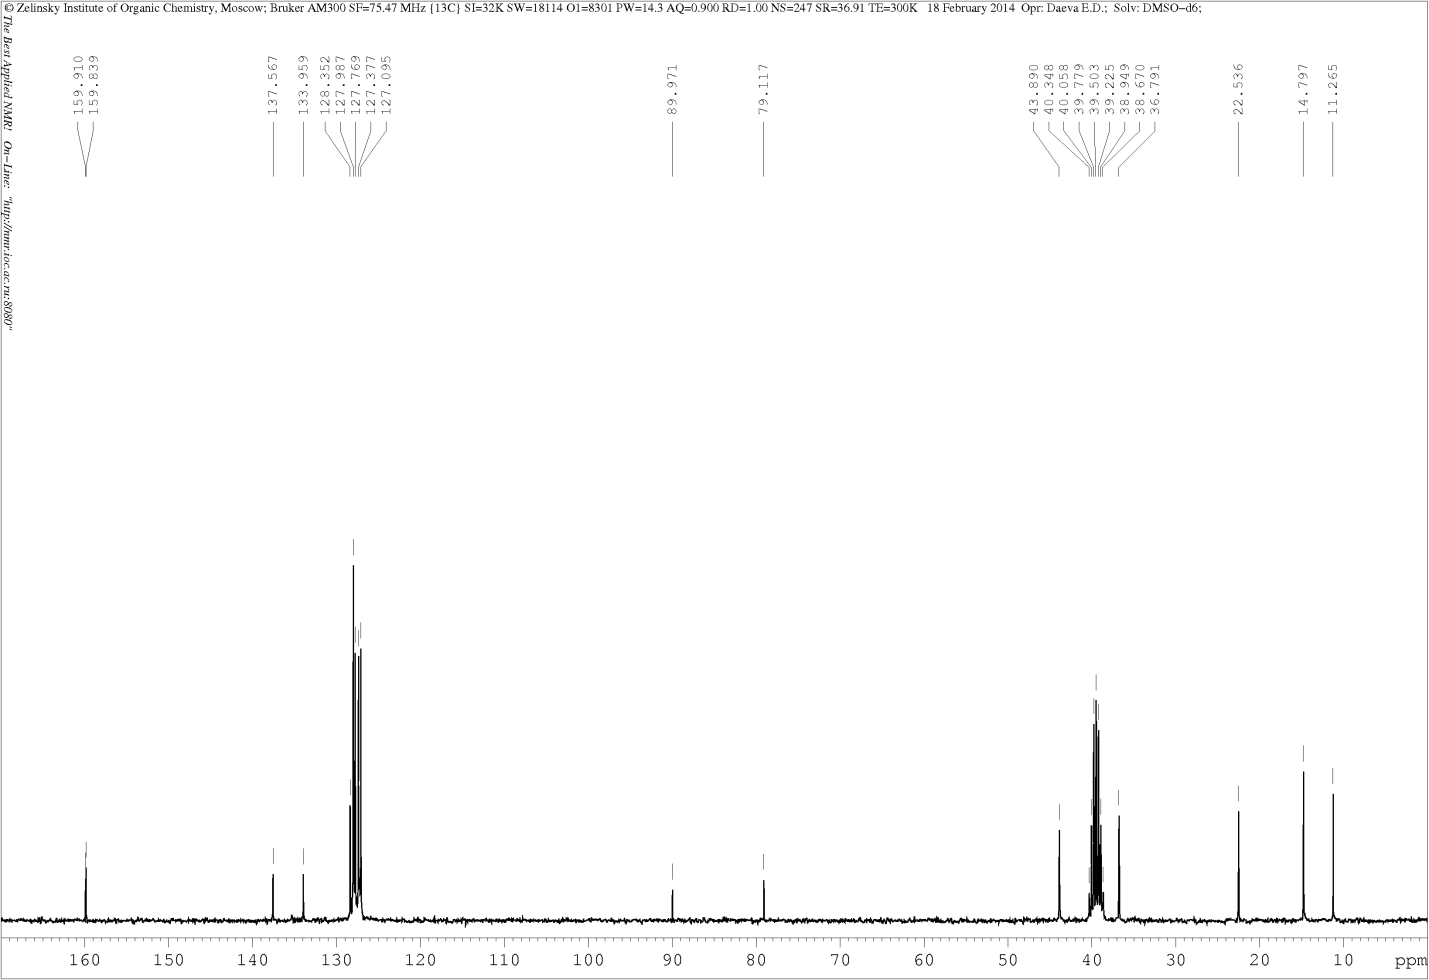


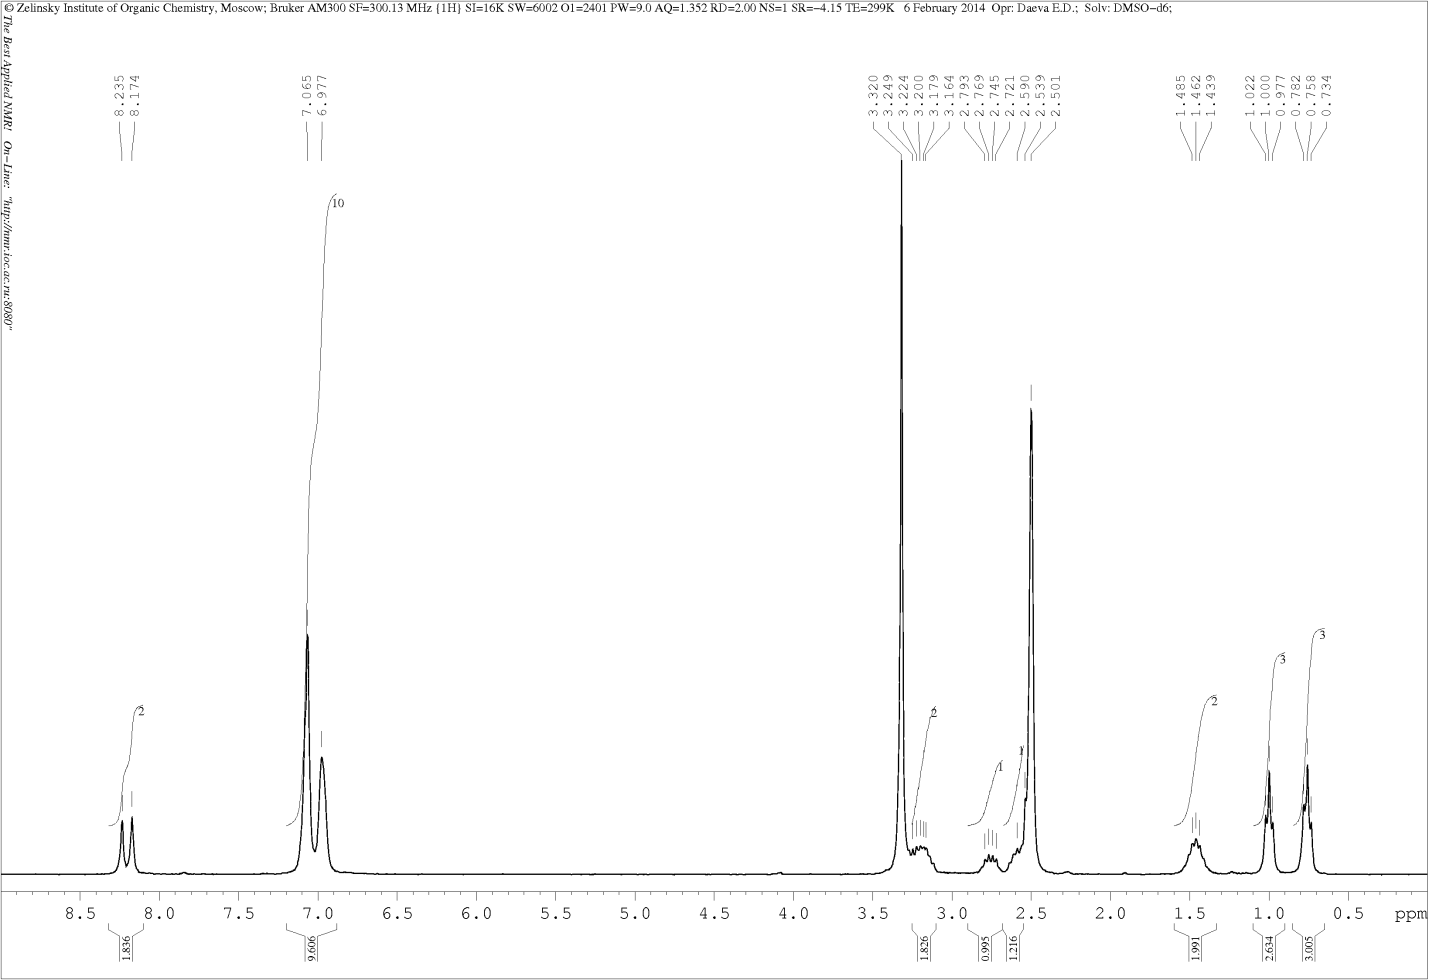


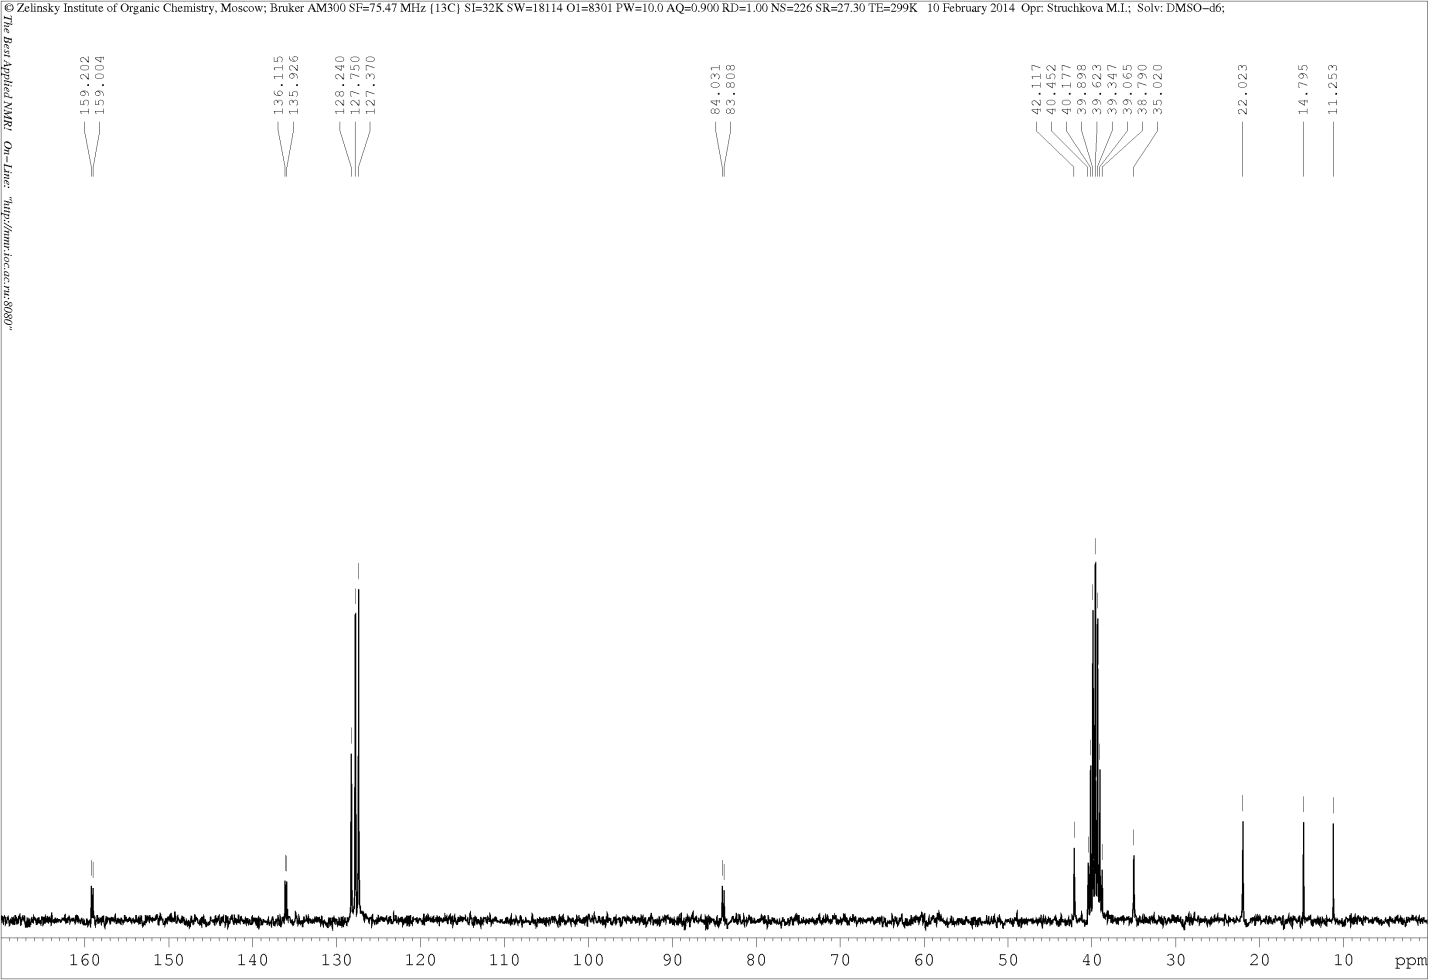


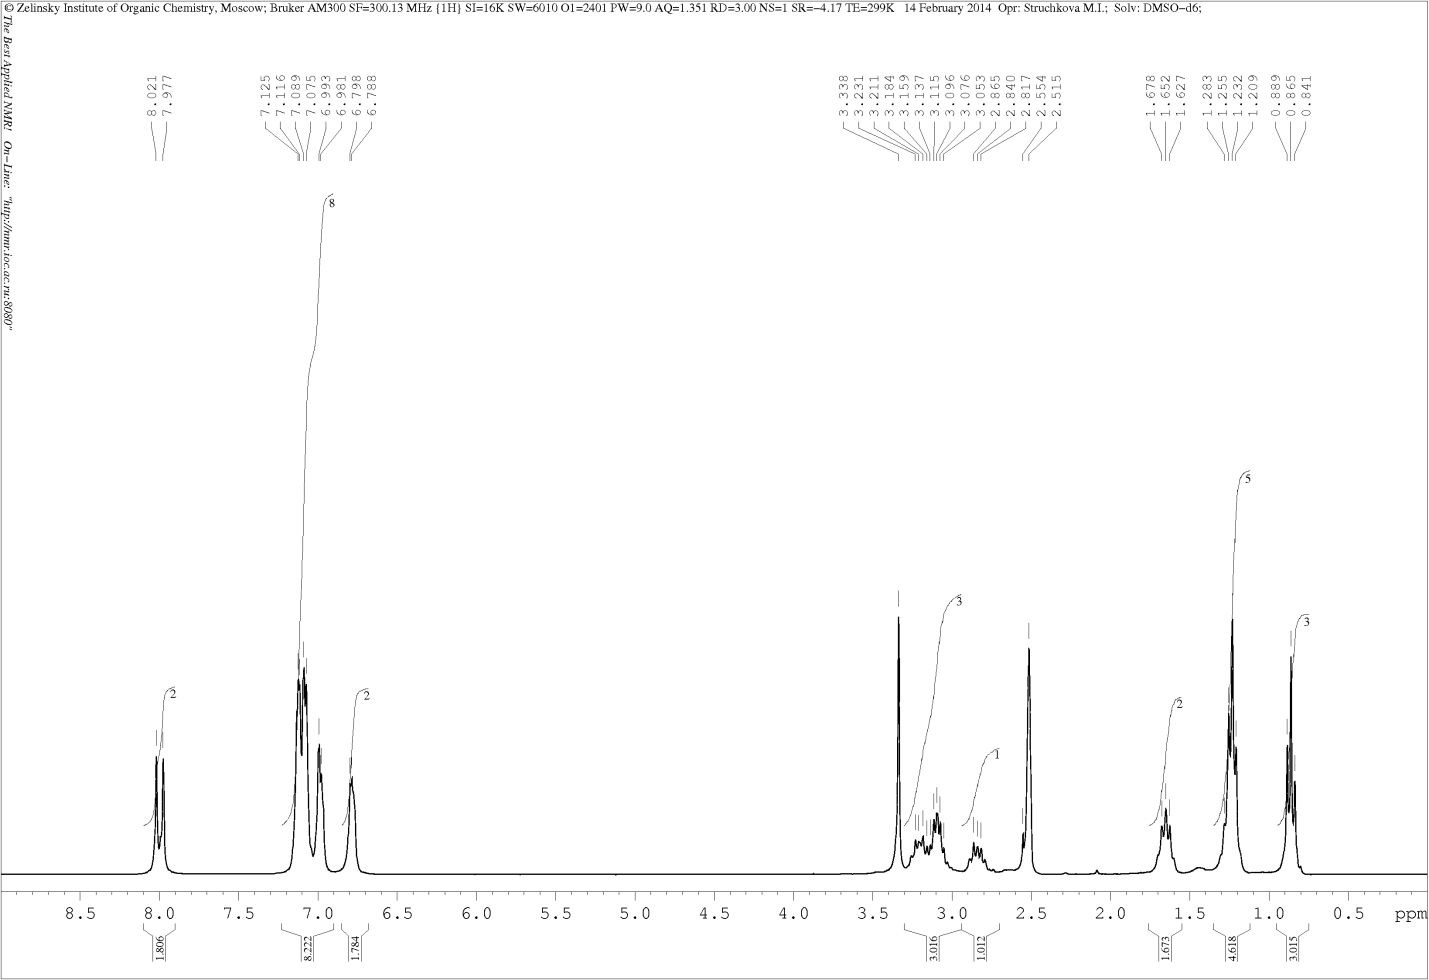


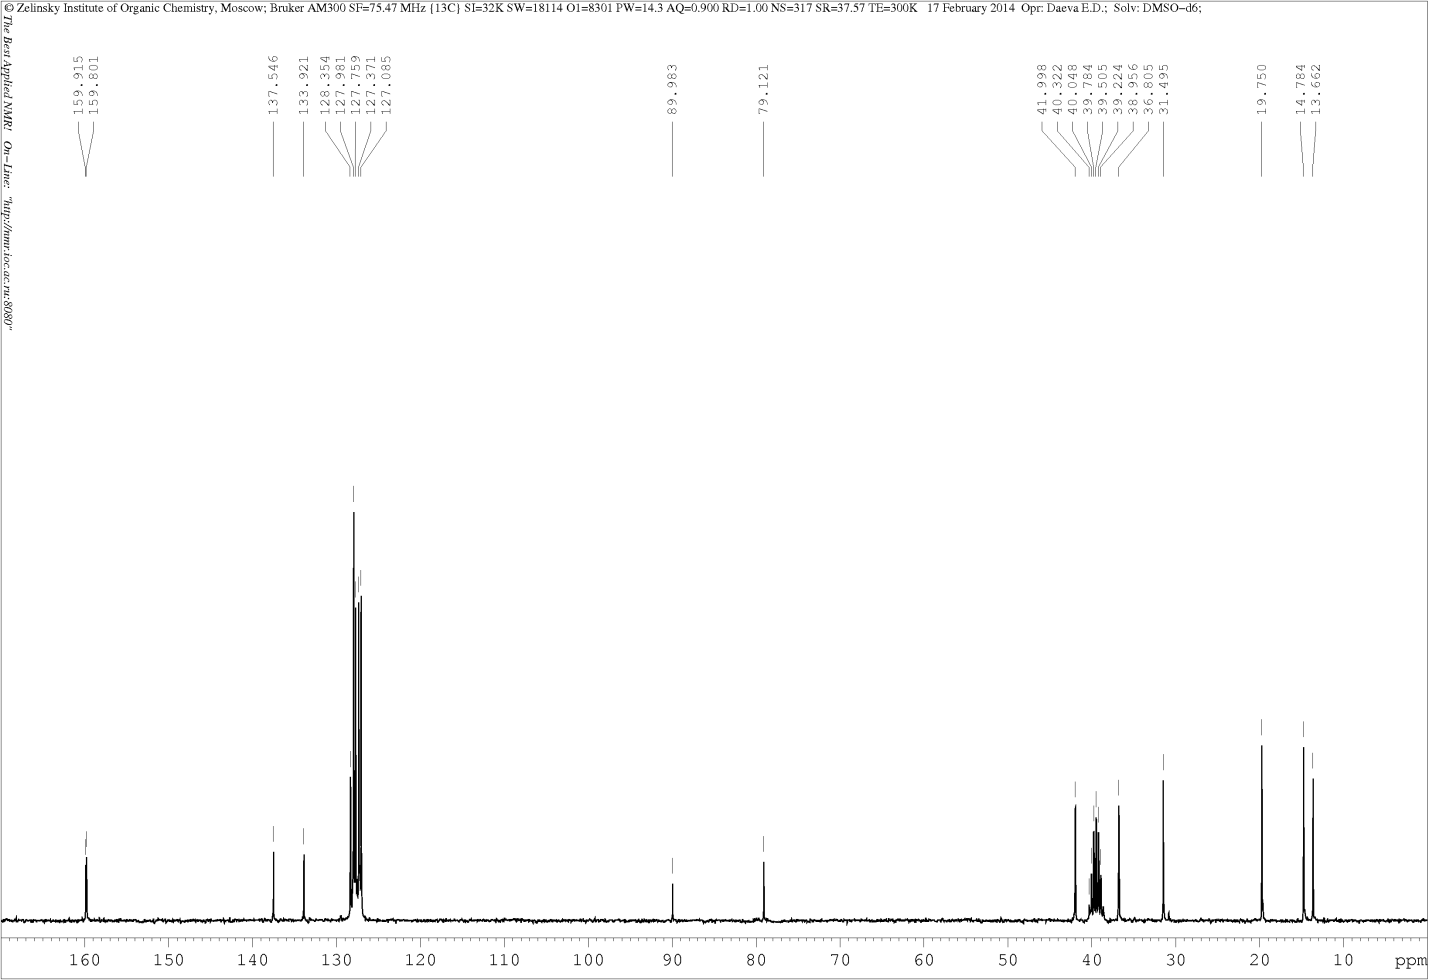


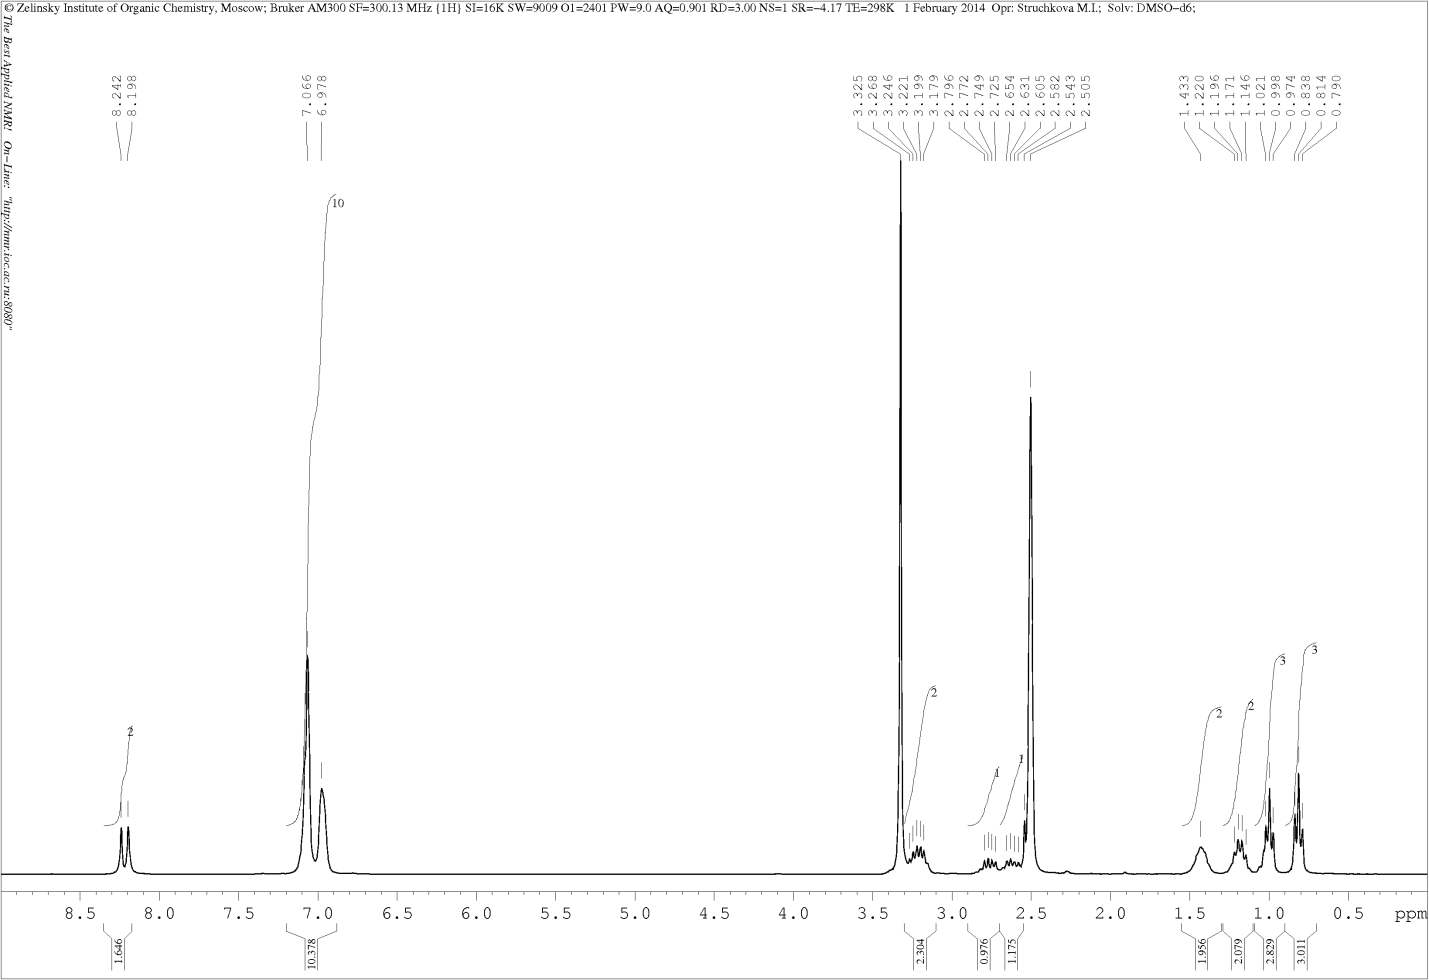


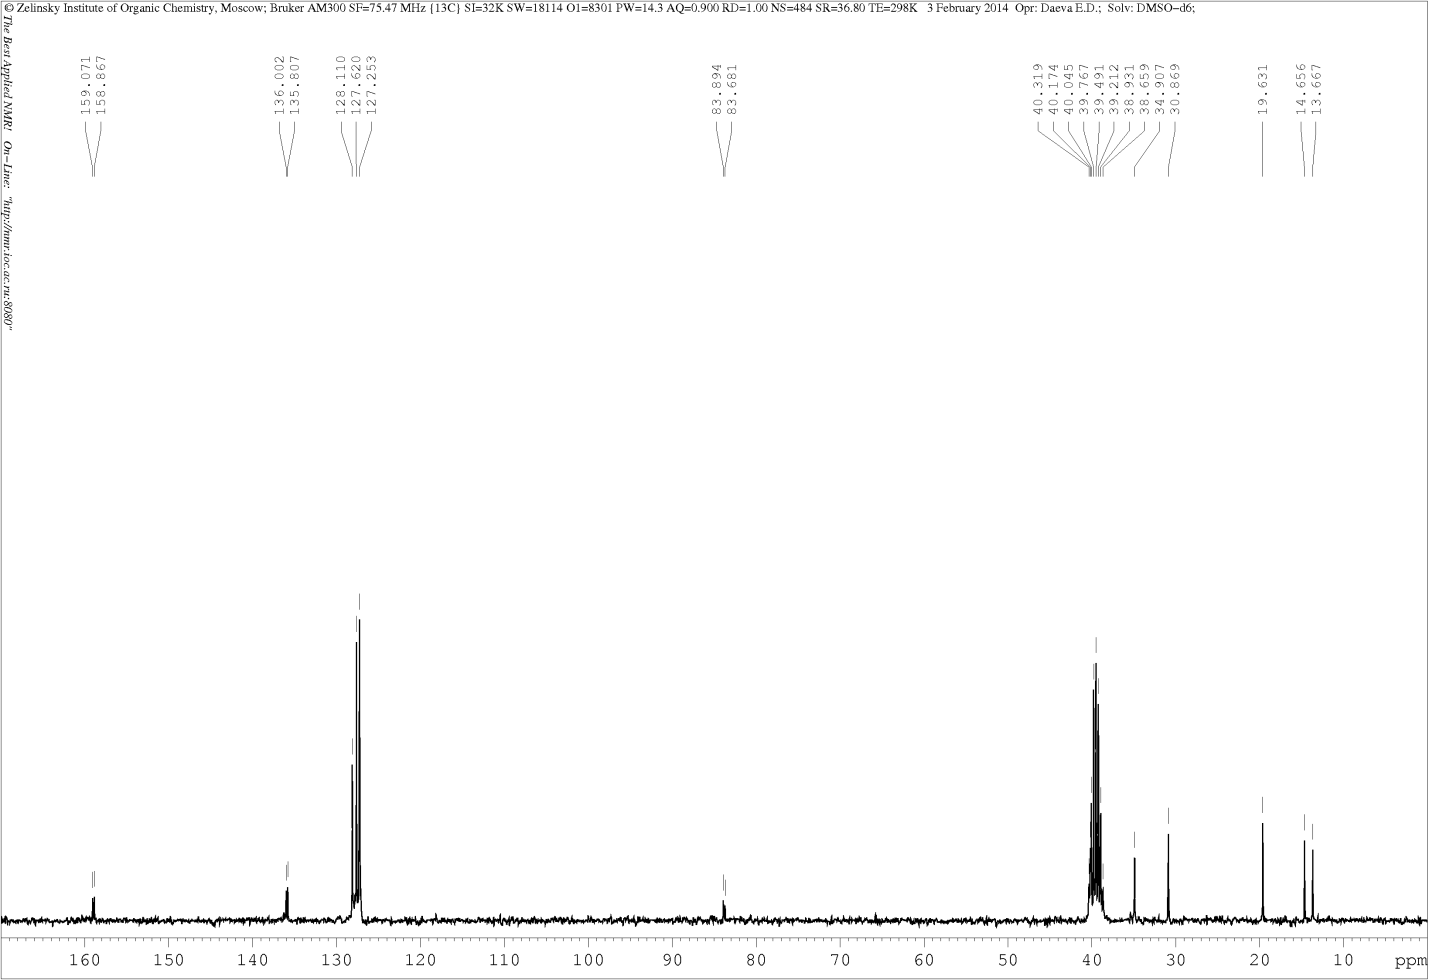


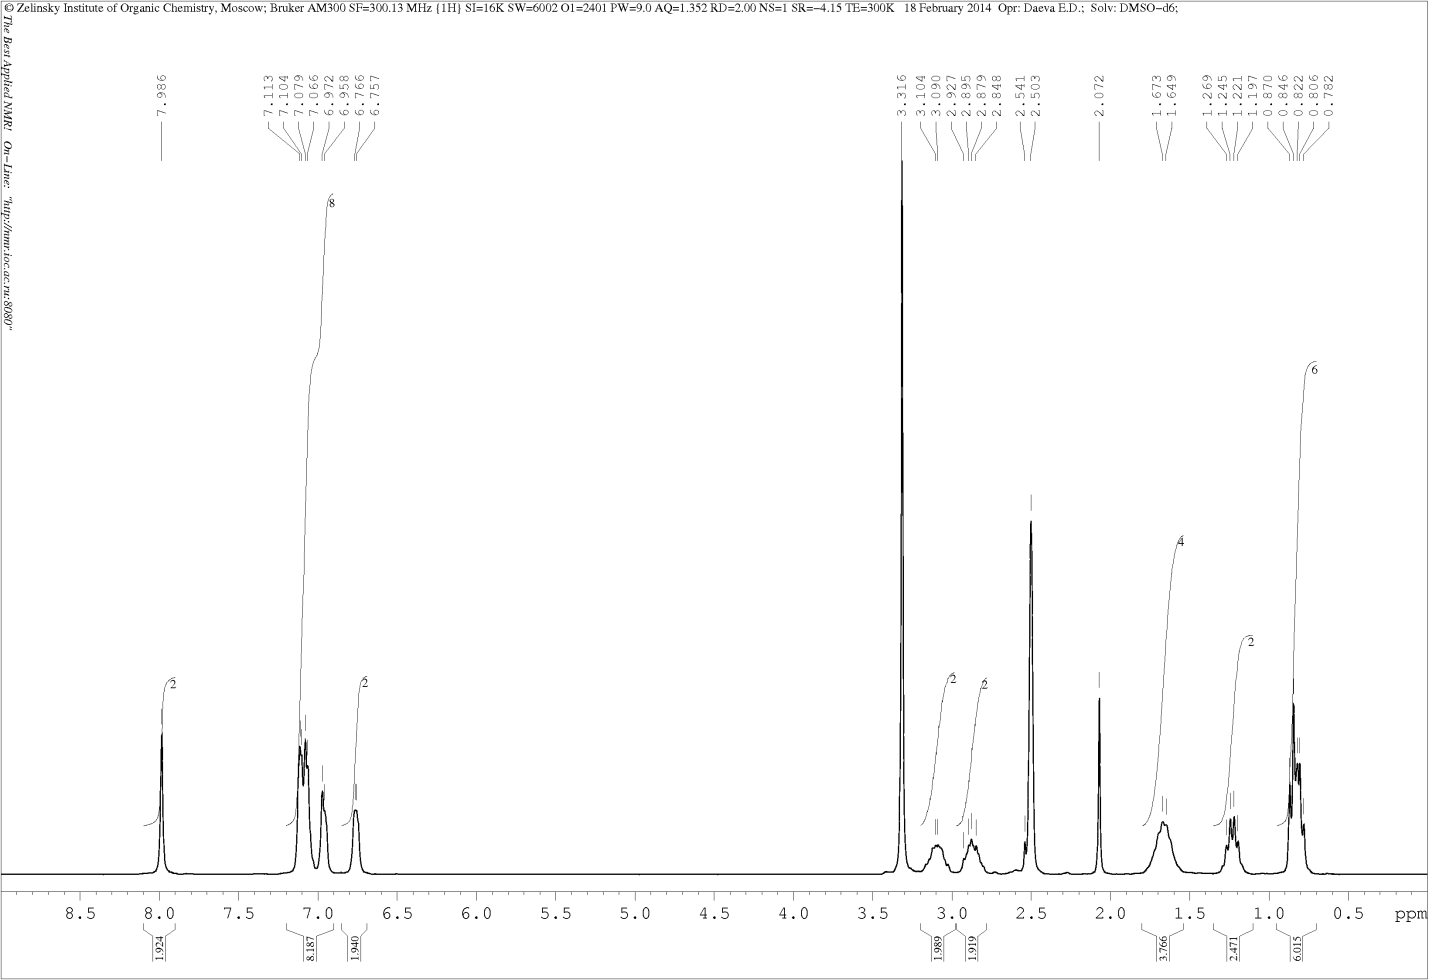


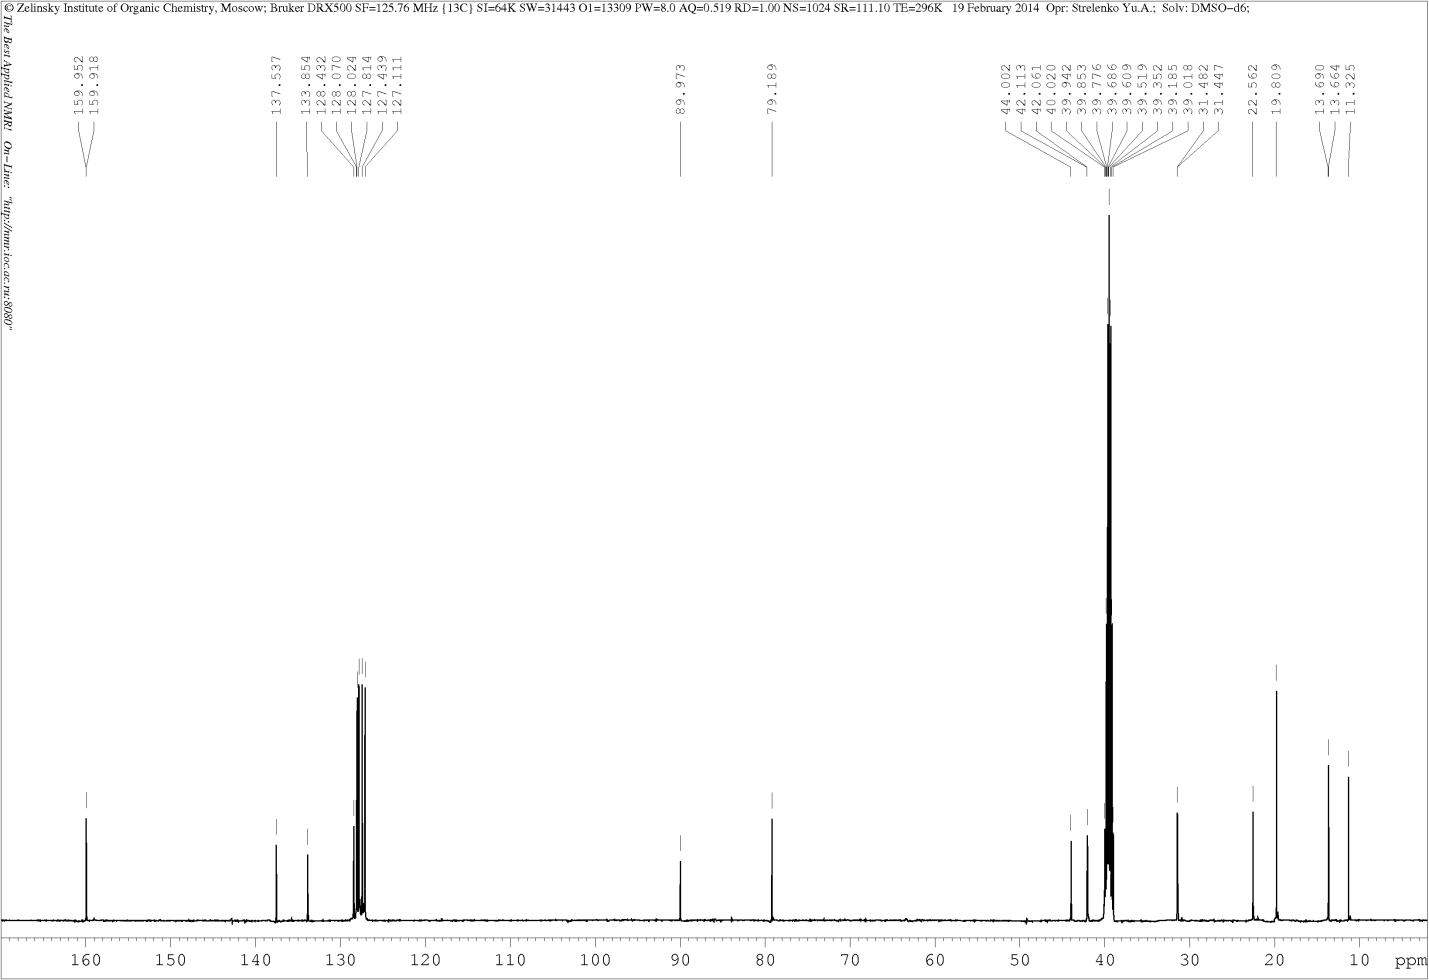


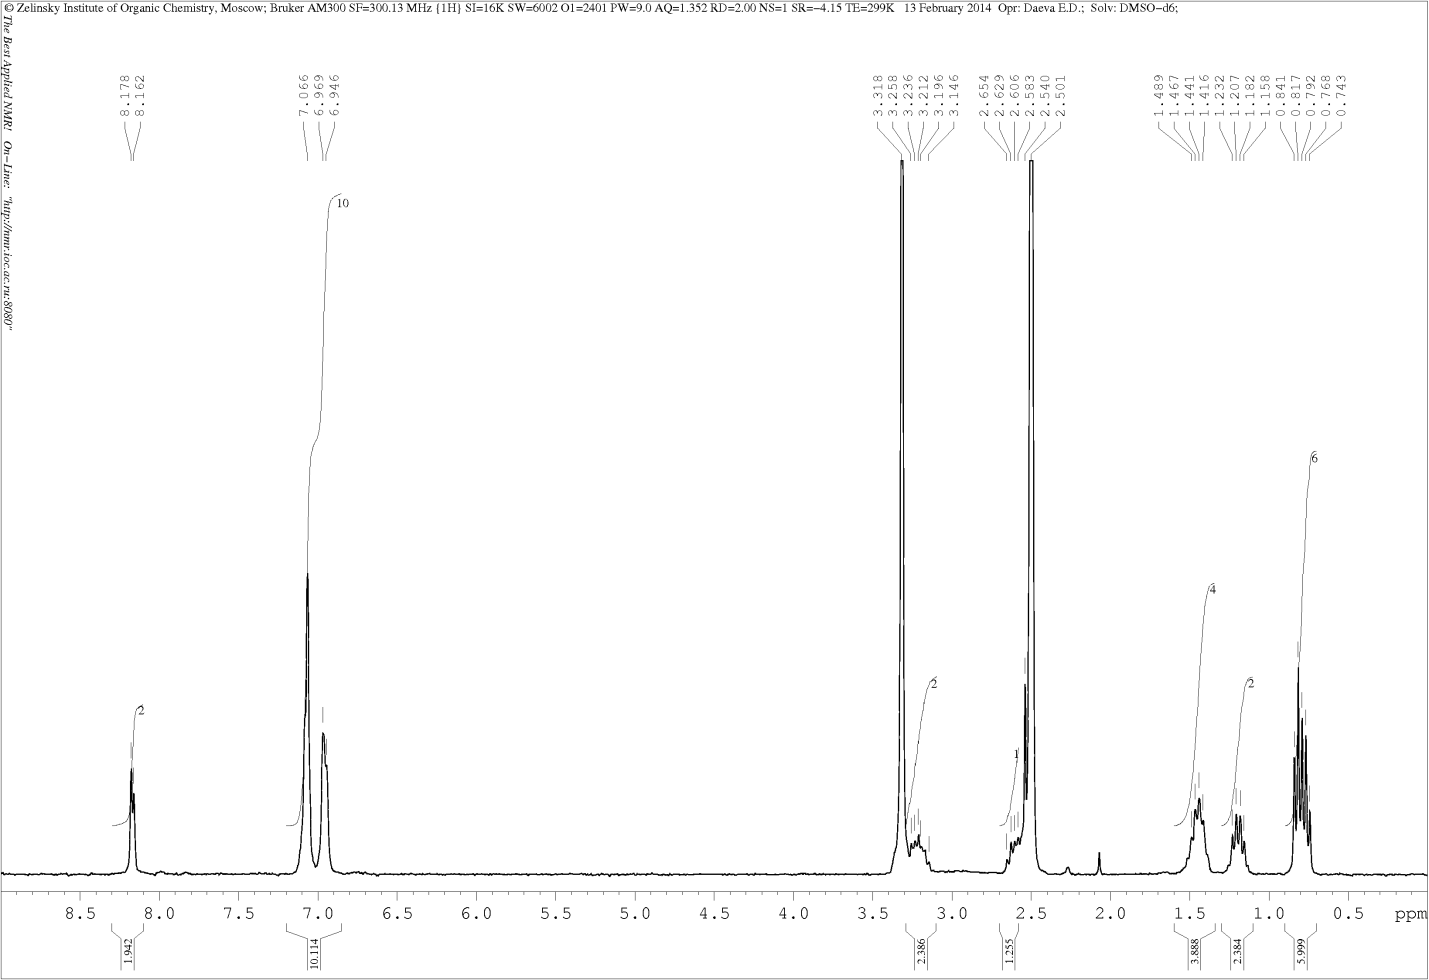


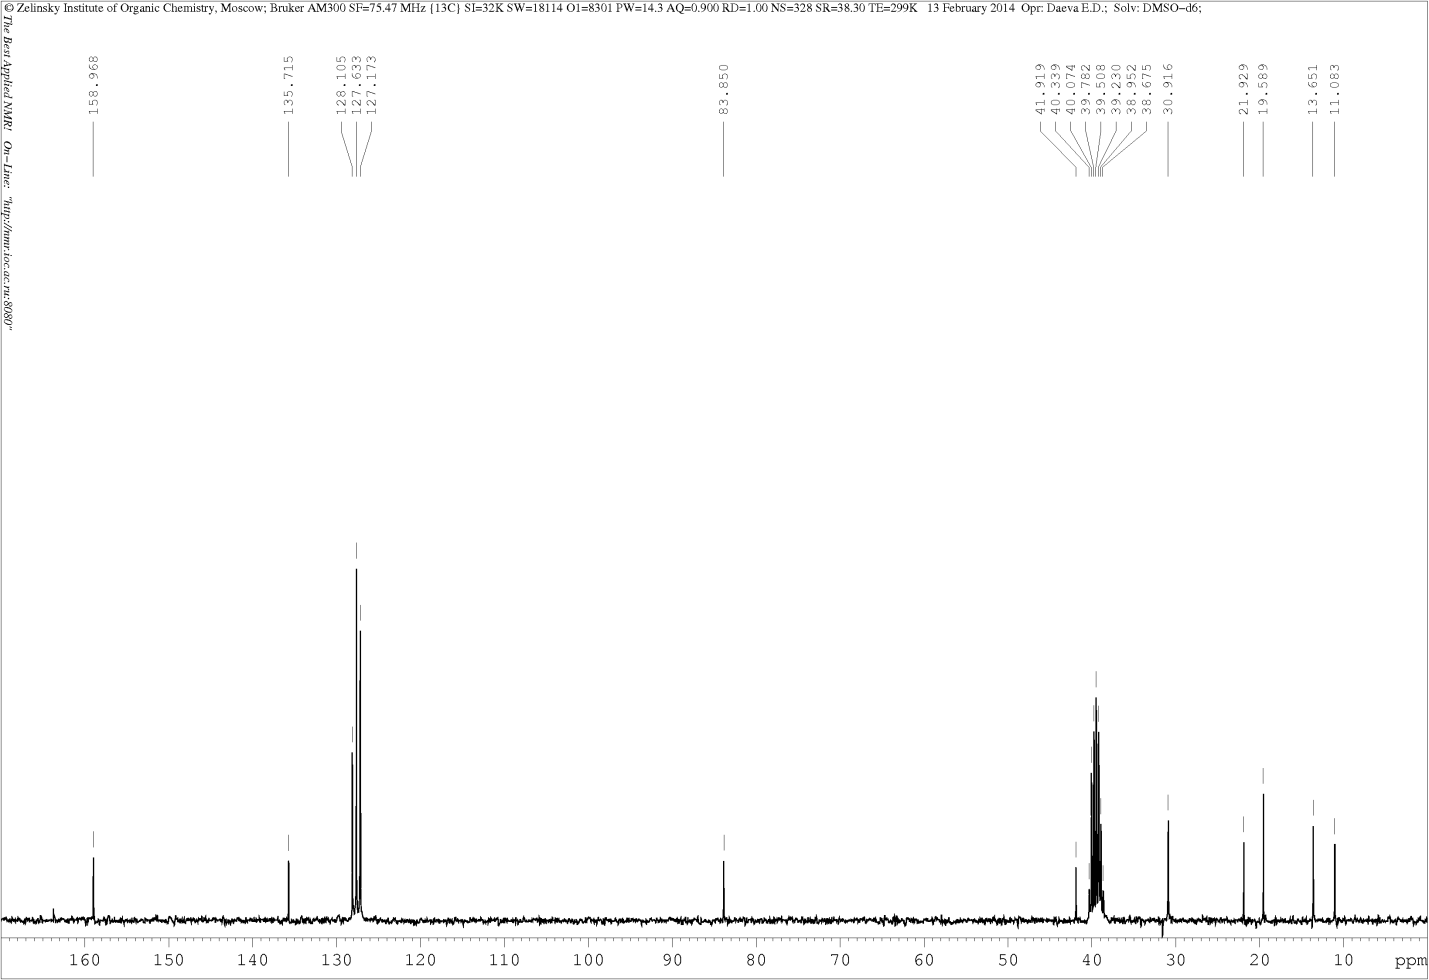

Supplement: Supplementary file 1 [file 4c6742a0a756ab66fc155673.docx]
